# Supplementary material
Source: publisher figshare collection journal article supplement (https://acs.figshare.com/ndownloader/files/4041079)
Supplement: Supplementary file 1 [file 4041079]

## Dissociation Free-Energy Profiles of Specific and Nonspecific DNA–Protein Complexes

Yoshiteru Yonetani, Hidetoshi Kono

Molecular Modeling and Simulation Group, Quantum Beam Science Directorate, Japan Atomic Energy Agency, 8-1-7 Umemidai, Kizugawa, Kyoto 619-0215, Japan

In Figures S1 and S2, behavior of the Lac H1-H3 domain at the points,  $S_I$  -  $S_{III}$  (specific) and  $N_I$  -  $N_{III}$  (nonspecific), are characterized. The specific  $S_I$  shows lower RMSD (Fig. S1) and smaller orientational fluctuation (Fig. S2) than nonspecific  $N_I$ , which confirmed that specific binding is tight and nonspecific binding loose.

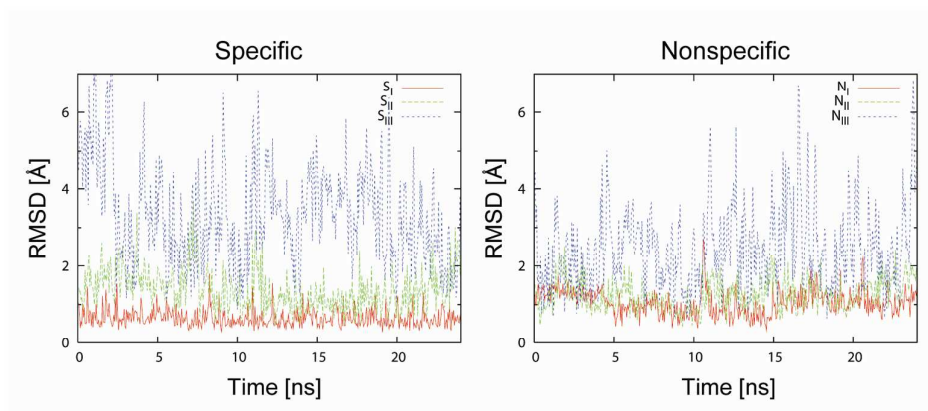

**Figure S1.** Root mean square deviations for main-chain atoms in the Lac H1-H3 domain (residues 6-45). Shown are the trajectories in each 1 Å window:  $S_I$  (12 - 13 Å),  $S_{II}$  (15 - 16 Å),  $S_{III}$  (25 - 26 Å),  $N_I$  (14 - 15 Å),  $N_{II}$  (16 - 17 Å), and  $N_{III}$  (25 - 26 Å). The reference structure used here was the average structure in each trajectory, which was calculated after the DNA fragment bound to the Lac H1-H3 domain was superimposed.

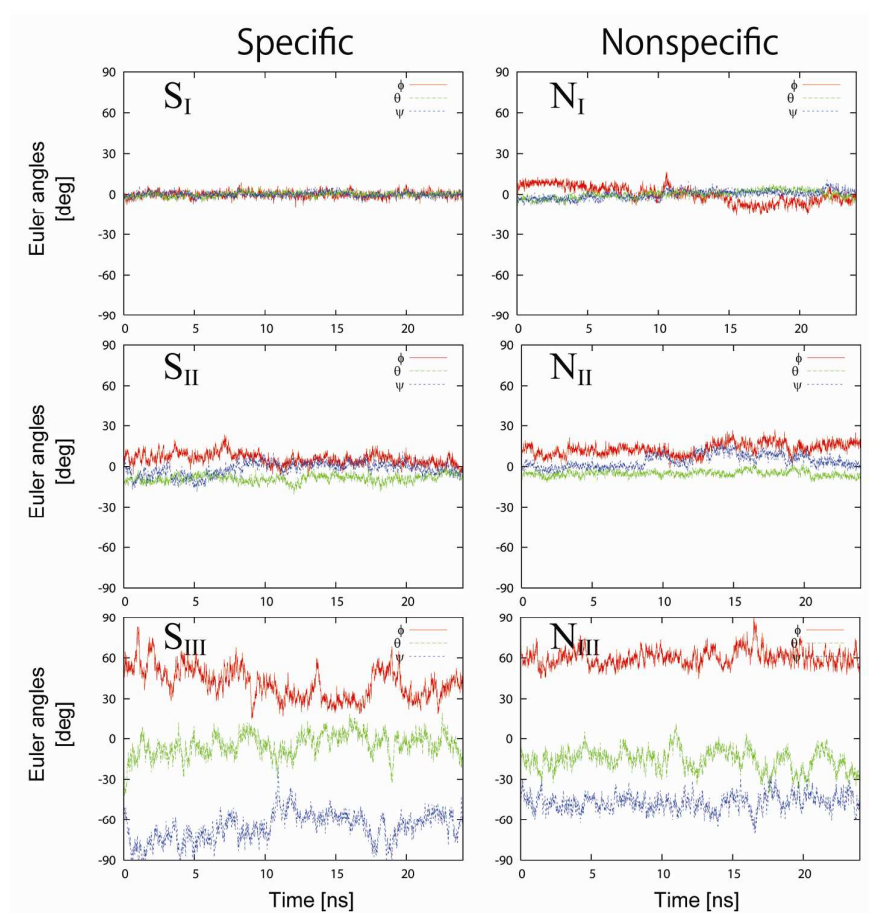

**Figure S2.** Orientation of the Lac H1-H3 domain. Shown are the trajectories in each 1 Å window:  $S_I$  (12 - 13 Å),  $S_{II}$  (15 - 16 Å),  $S_{III}$  (25 - 26 Å),  $N_I$  (14 - 15 Å),  $N_{II}$  (16 - 17 Å), and  $N_{III}$  (25 - 26 Å). The reference that corresponds to  $\phi = \theta = \psi = 0$  is the average structure at each bound state (i.e.,  $S_I$  for specific  $S_I - S_{III}$  and  $N_I$  for nonspecific  $N_I - N_{III}$ ). The average structure was calculated after the DNA fragment bound to the Lac H1-H3 domain was superimposed. Euler angles  $\phi$ ,  $\theta$ , and  $\psi$  denote a rotational transformation which makes the reference Lac structure best fit to the current structure. The Euler angles are according to the Tait-Bryan  $xyz$ -convention (see H. Goldstein, Classical Mechanics, 2nd Ed., 1980, Addison-Wesley).
